# Supplementary material for: Polydextrose with and without Bifidobacterium animalis ssp. lactis 420 drives the prevalence of Akkermansia and improves liver health in a multi-compartmental obesogenic mice study
Source: PubMed Central journal article supplement (PMC8638982; doi:10.1371/journal.pone.0260765), 2021-12-02
Supplement: pone.0260765.s001.pdf [file pone.0260765.s001.pdf]

A

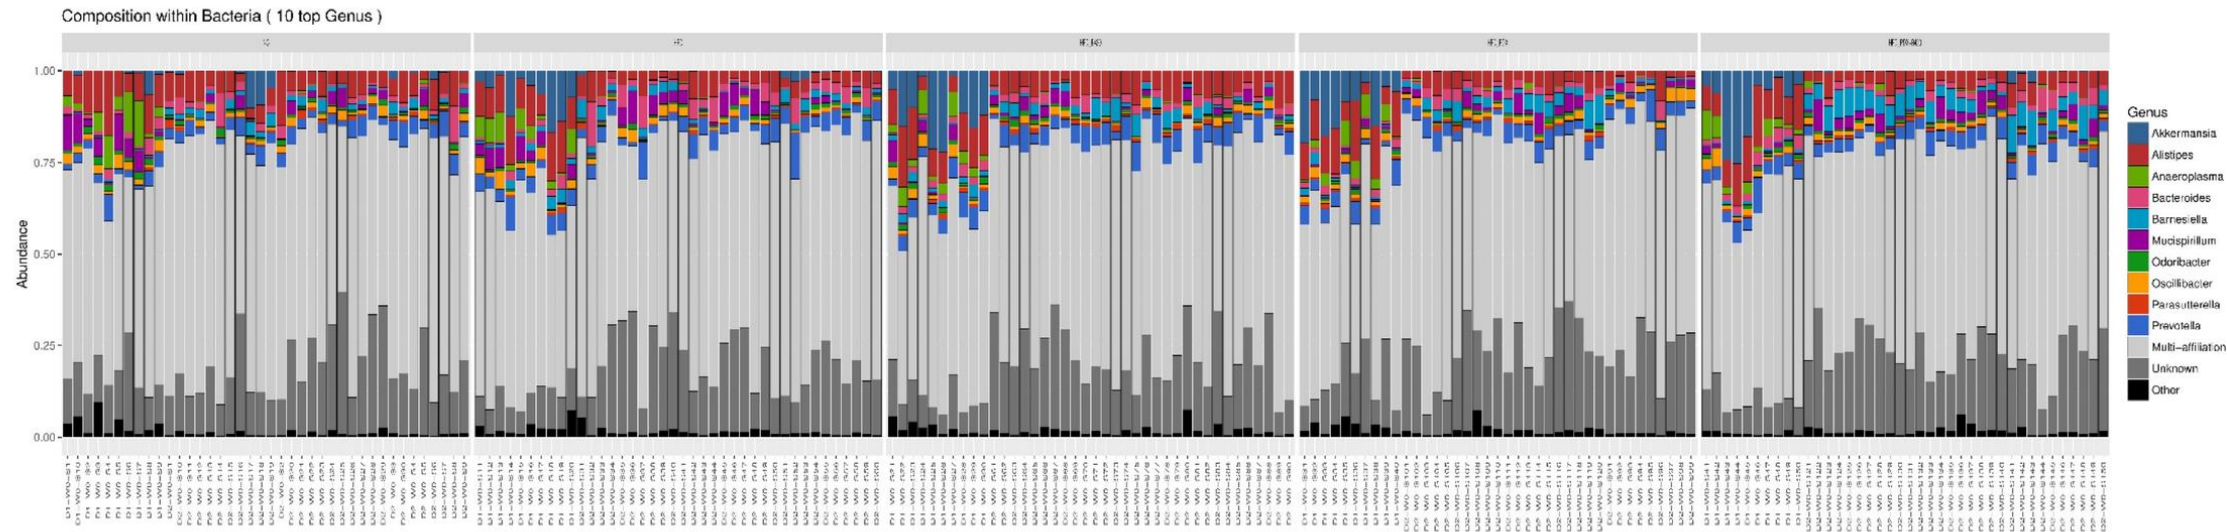

B

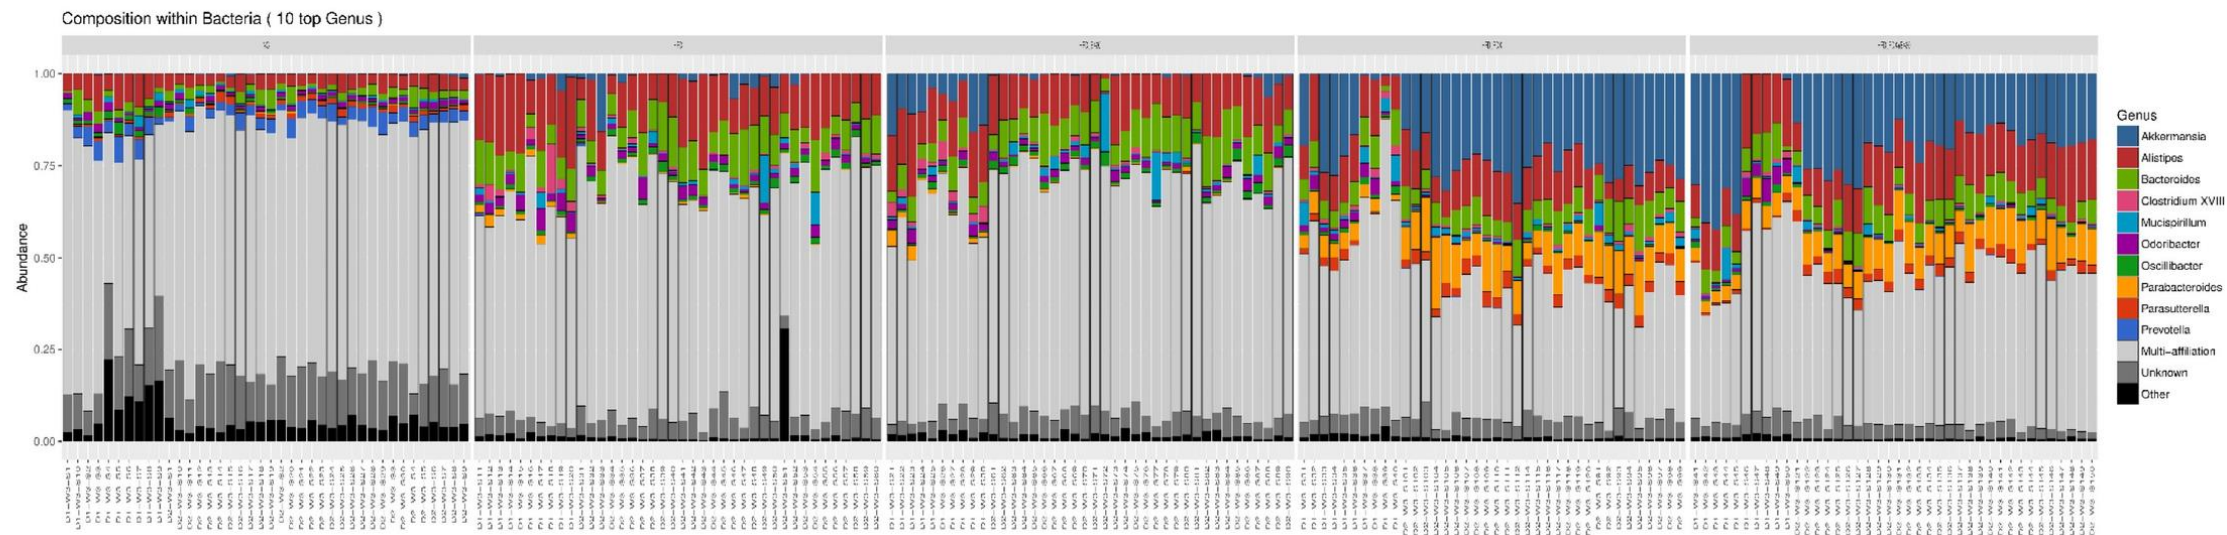

S1 Fig. Relative abundance at Genus level from metagenomic sequencing. (A) Fecal samples at week 0. (B) Fecal samples at week 3. The order of the treatments is from left to right: NC, HFD, HFD+B420, HFD+PDX and HFD+S.

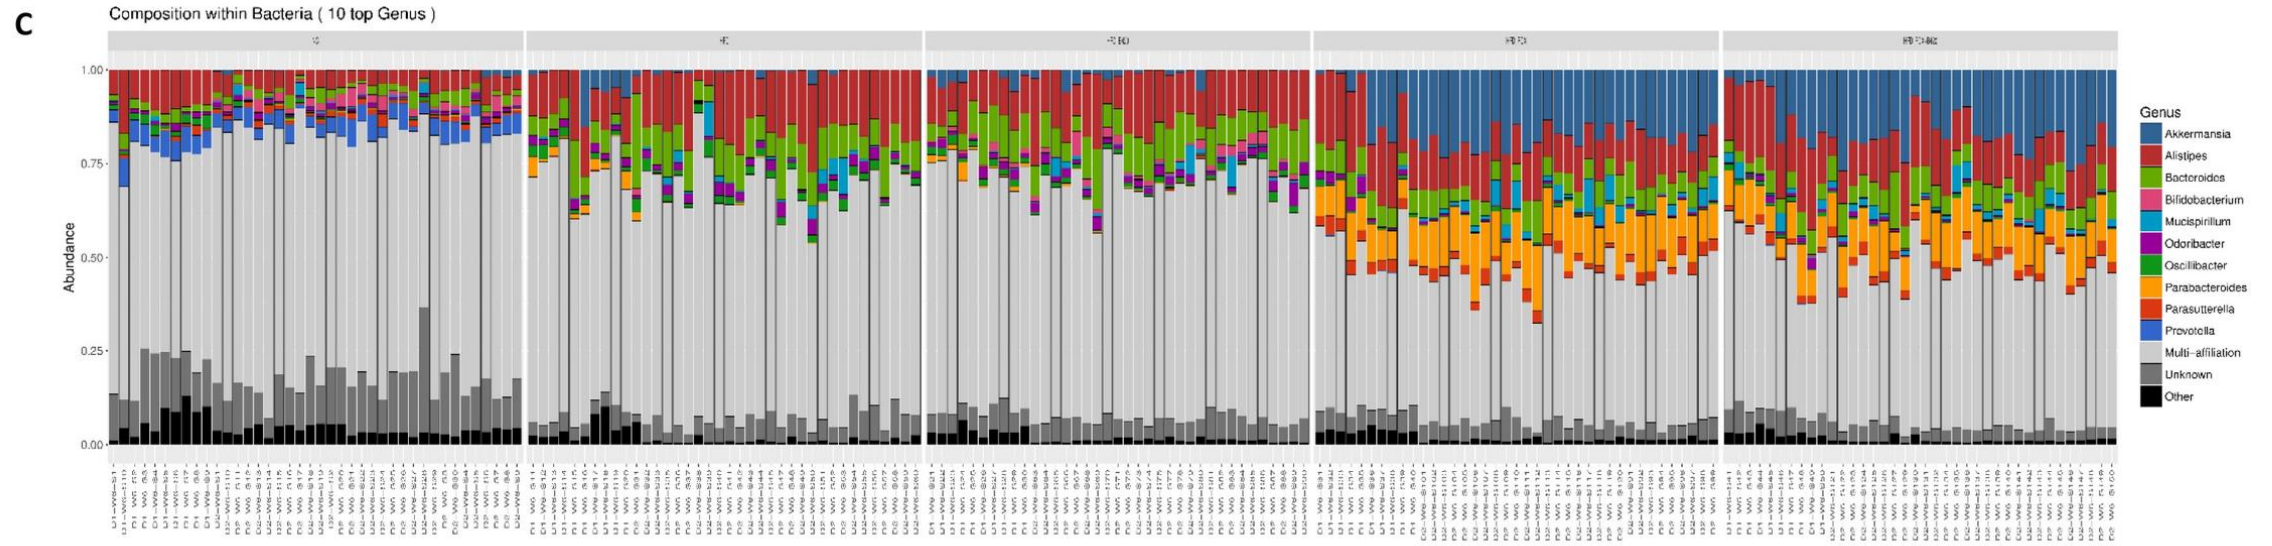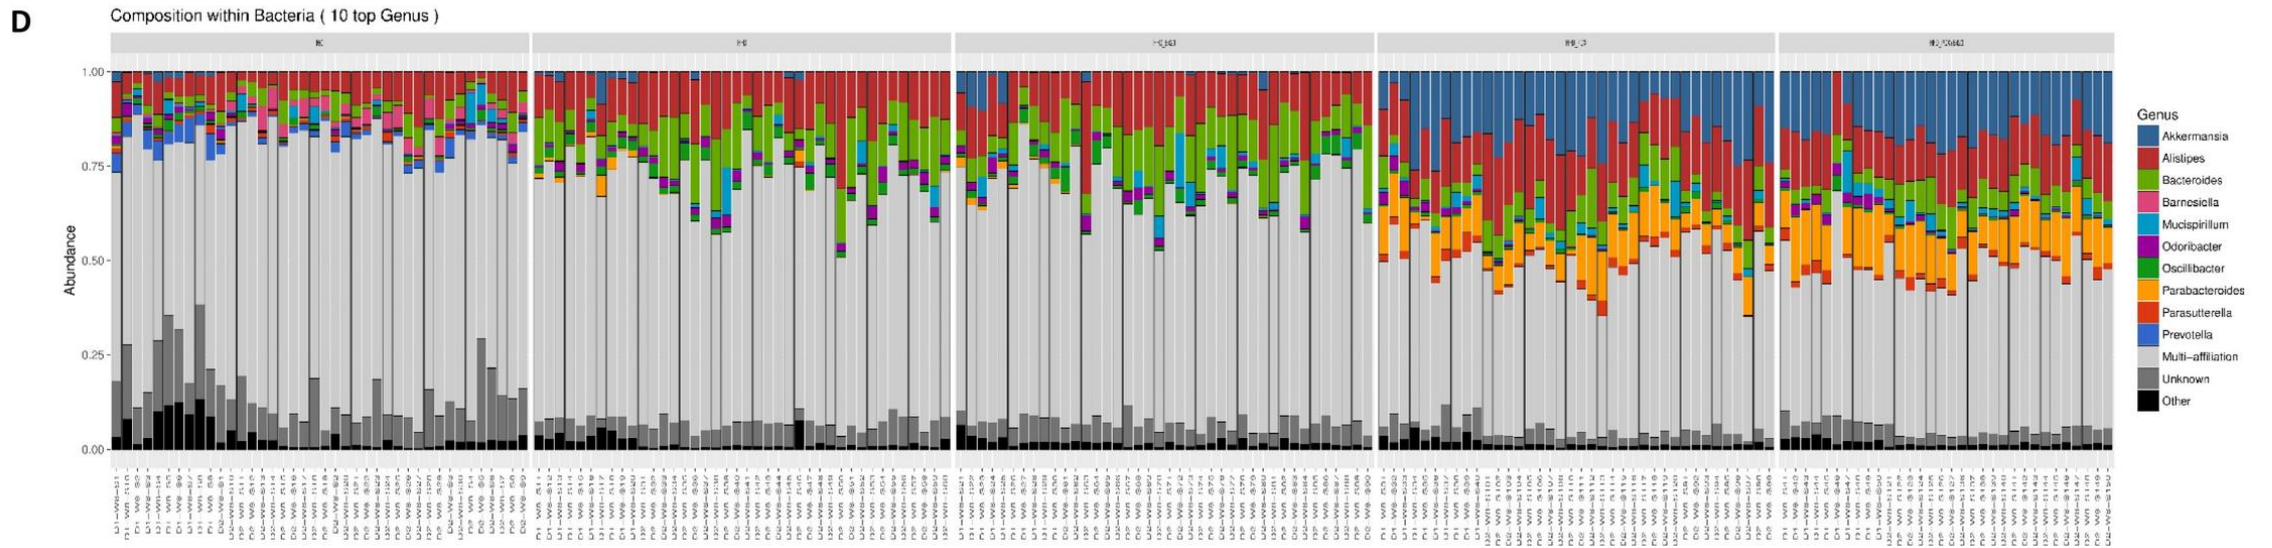

S1 Fig. Relative abundance at Genus level from metagenomic sequencing. (C) Fecal samples at week 6. (D) Fecal samples at week 8. The order of the treatments is from left to right: NC, HFD, HFD+B420, HFD+PDX and HFD+S.



E

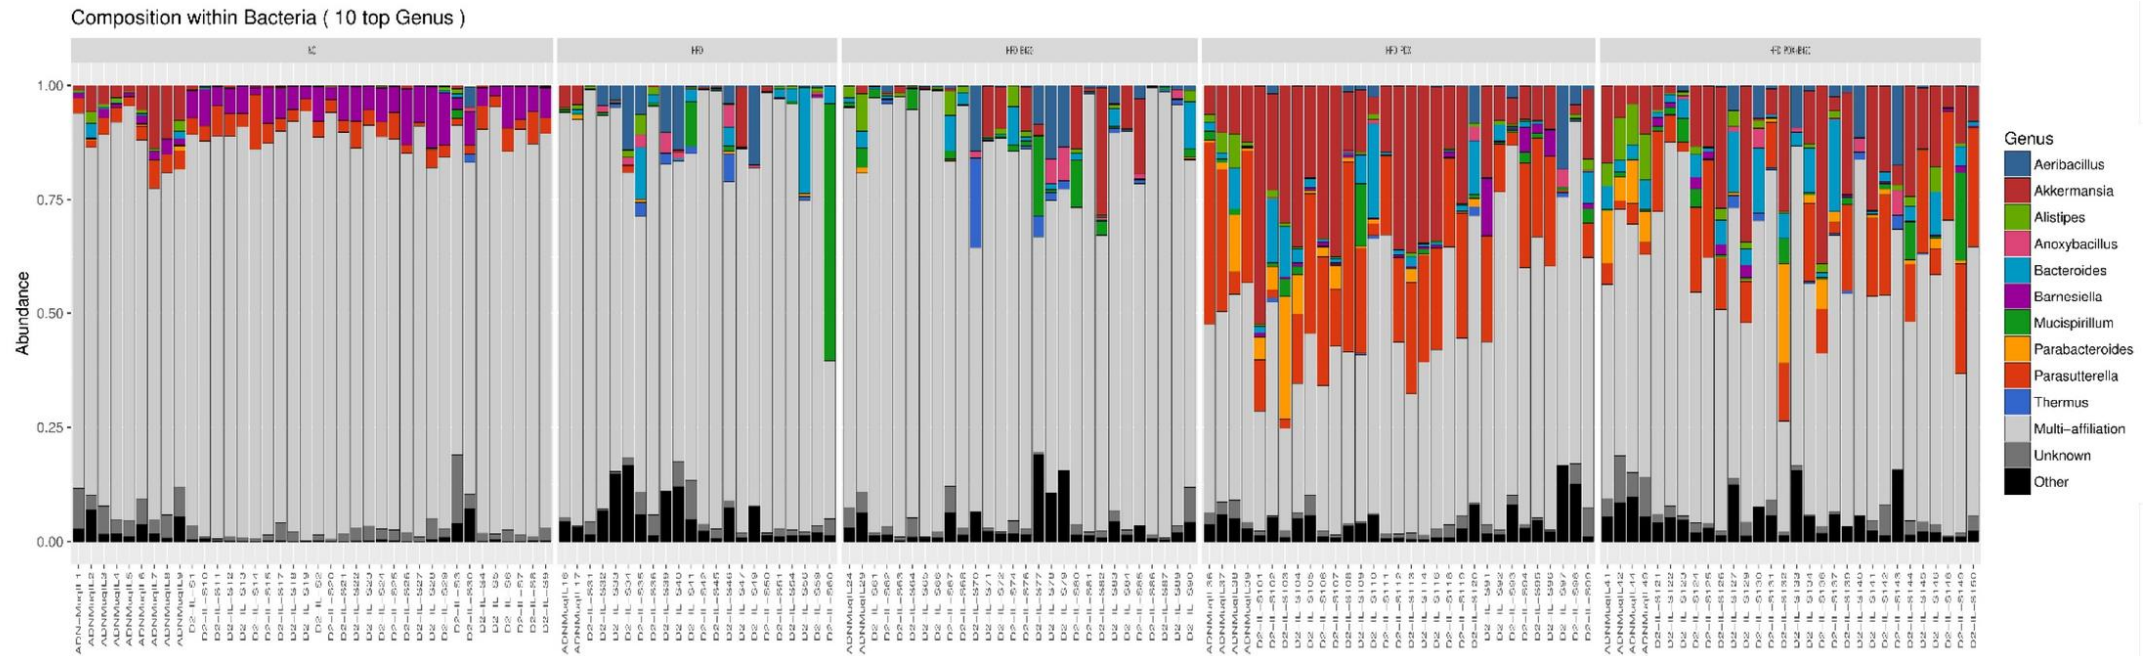

F

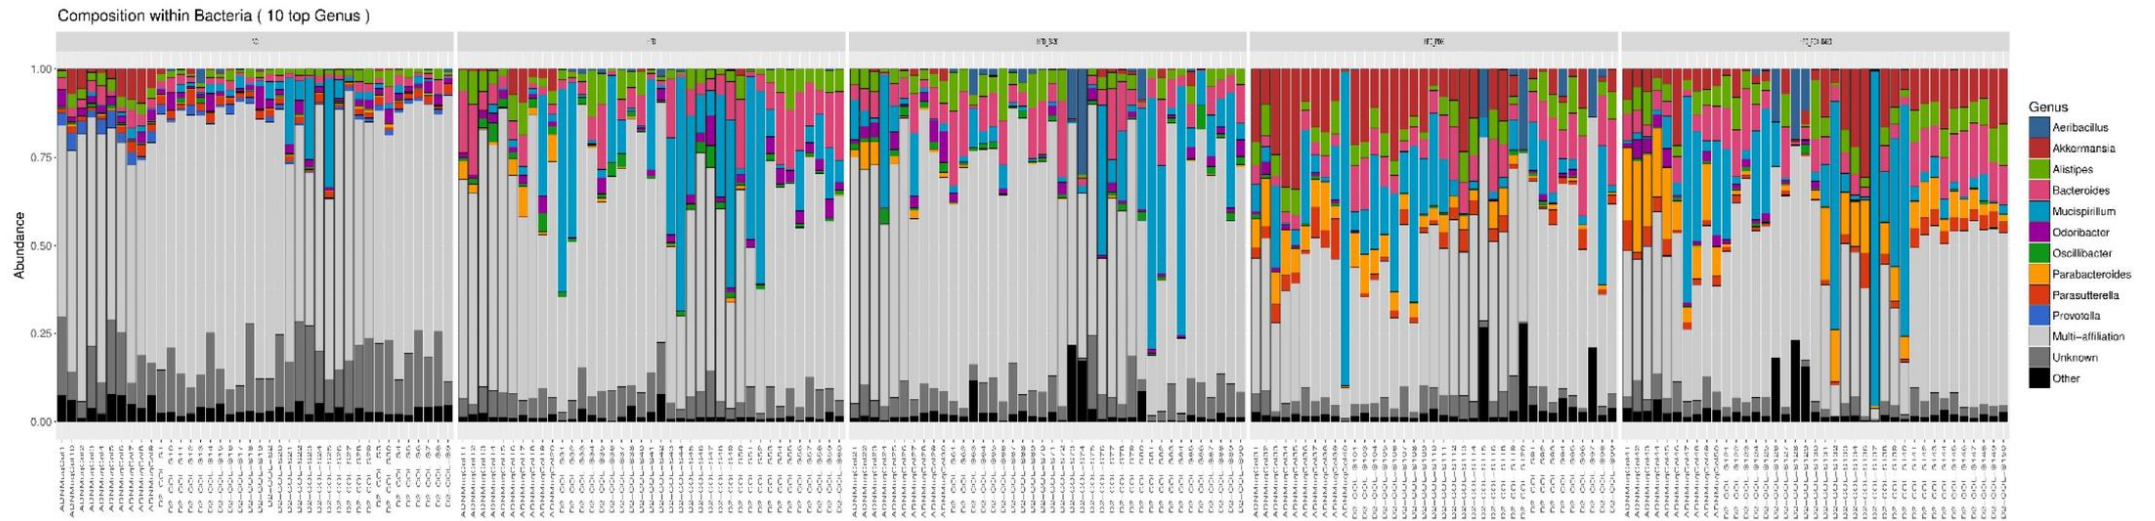

S1 Fig. Relative abundance at Genus level from metagenomic sequencing. (E) Ileum samples. (F) Colon samples. The order of the treatments is from left to right: NC, HFD, HFD+B420, HFD+PDX and HFD+S.

G

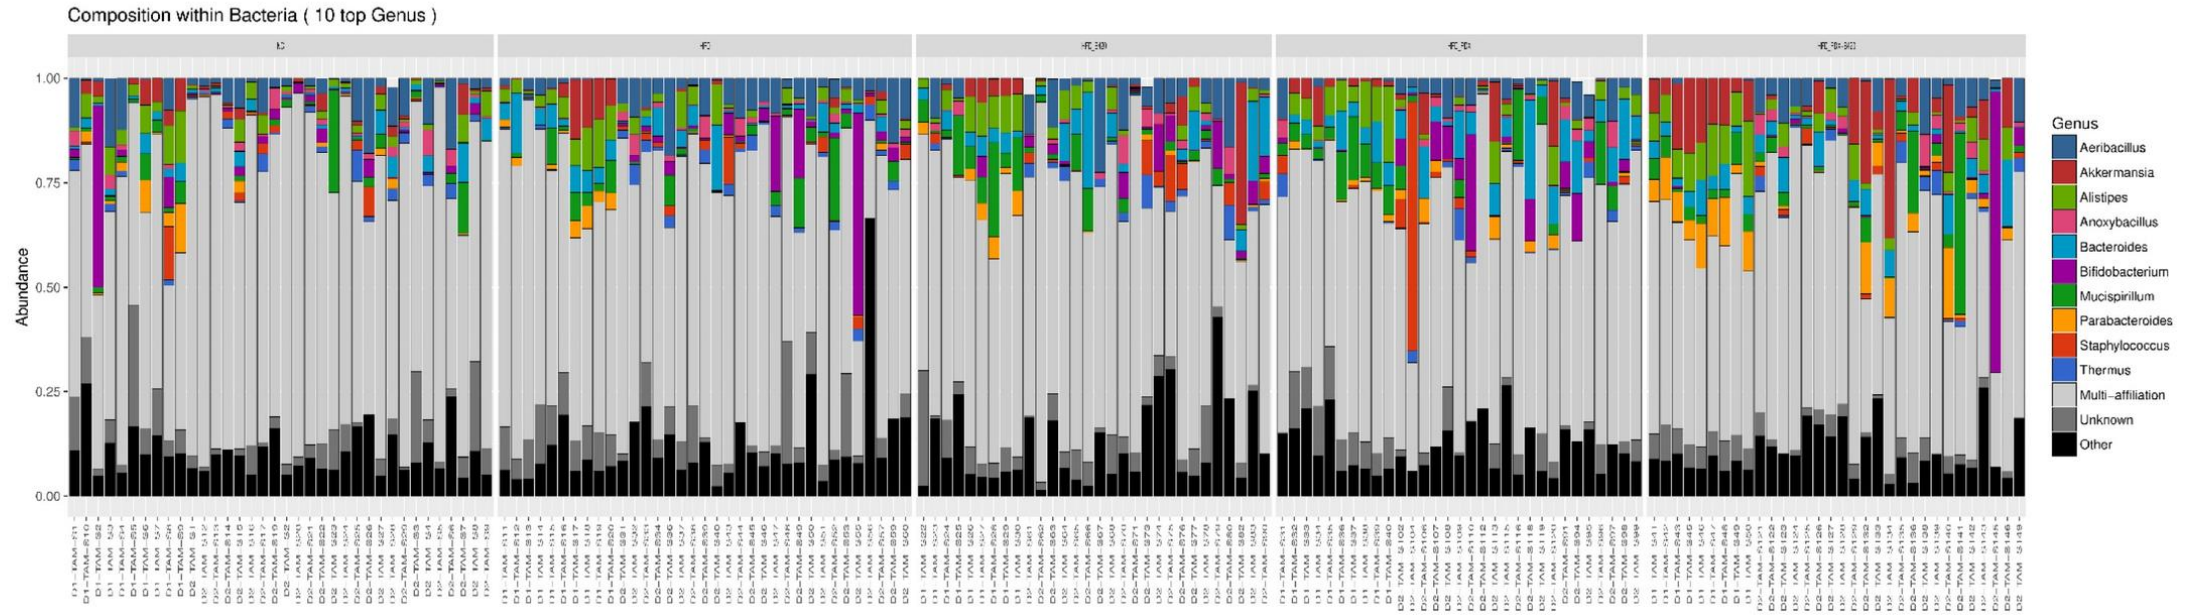

S1 Fig. Relative abundance at Genus level from metagenomic sequencing. (G) Adipose tissue (MAT) samples. The order of the treatments is from left to right: NC, HFD, HFD+B420, HFD+PDX and HFD+S.
